# Supplementary material for: Pentavalent HIV-1 vaccine protects against simian-human immunodeficiency virus challenge
Source: PubMed Central journal article supplement (PMC5472724; doi:10.1038/ncomms15711), 2017-06-08
Supplement: ncomms15711-s1.pdf [file ncomms15711-s1.pdf]

**A**

- RV144 CRF01\_AE
- Challenge SHIV-1157(QNE)Y173H
- Pentavalent CRF01\_AE
- RV144 infected

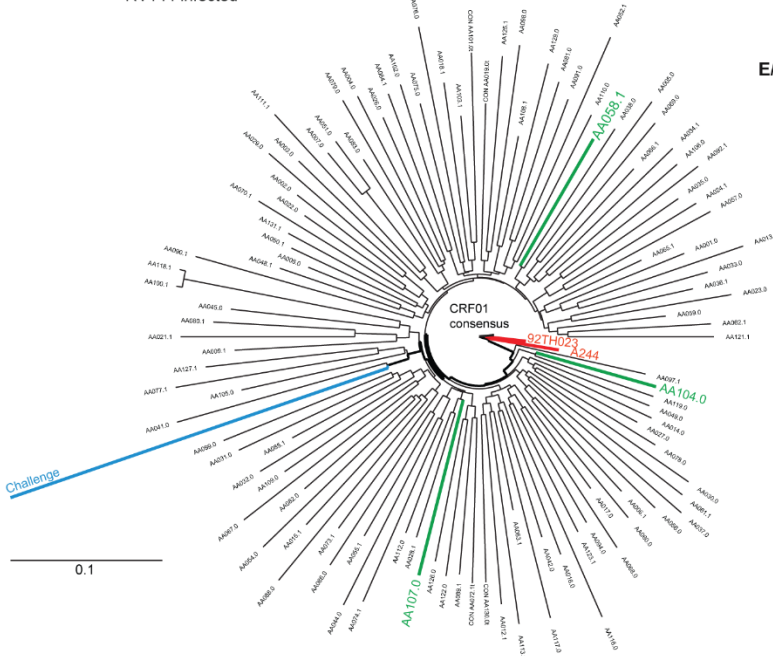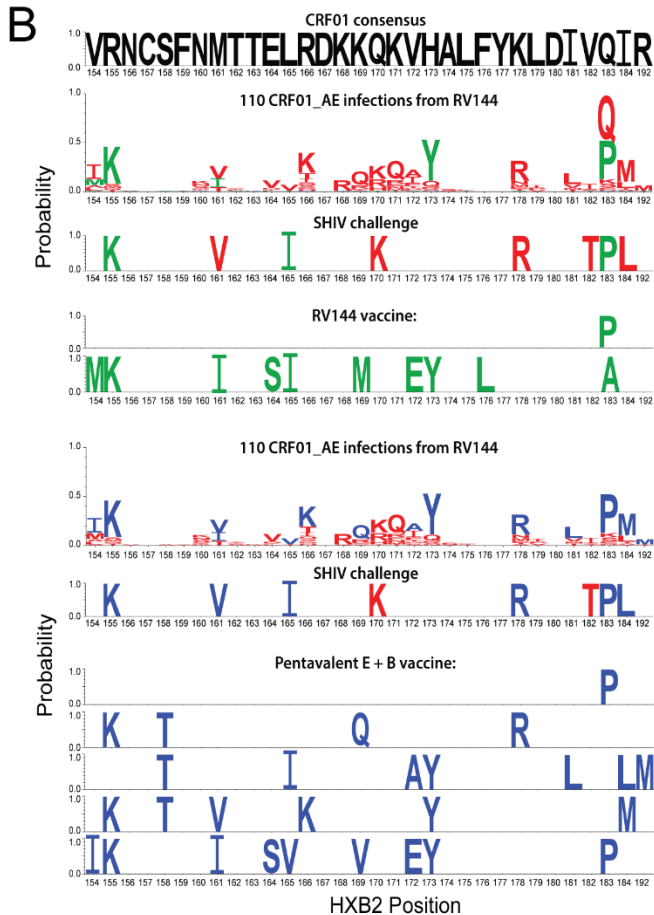

**C**

154 184

B/E 63521 IKNCSFNITTSVRDKVQKEYALFYKLDIVPI  
A244 VR...M...EL...K...VH.....

E/E/E AA104 VR...T...M...EI...K...AY.....L...L  
AA058 KR...T...M...EL...Q...VH...R.....  
AA107 KR...T...V...ELK...K...VY.....M

Key glycosylation sites for V1V2-glycan bnAbs  
Rolland Signature

**D**

164 186

SHIV-1157(QNE)Y173H: EIRDK**K**K**K**V**H**ALFYRLDITPLDD  
CH58: ELRDK**K**Q**K**V**H**ALFYRLDITPLDD  
CH59: ELRDK**K**Q**K**V**H**ALFYRLDITPLDD

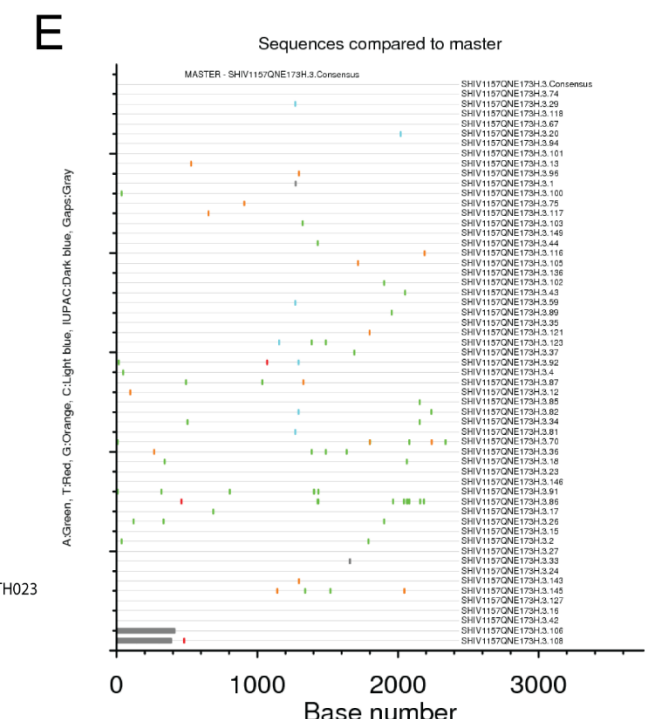

**Supplementary Figure 1. ALVAC-protein vaccines and macaque immunization.** (A) Maximum likelihood tree illustrating CRF01\_AE gp120 protein sequence relationships between 107 Envs sampled in the RV144 trial (.1 vaccine and .0 placebo groups). The two CRF01\_AE immunogens used in the RV144 vaccine are in red. The 3 additional natural Envs selected to be included in the pentavalent vaccine are in green, and the heterologous challenge SHIV (SHIV-1157(QNE)Y173H) shown in blue. (B) Logos comparing the vaccine antigens in the V2 region to the CRF01\_AE sequences sampled from 110 infections in the RV144 trial and challenge SHIV. Black amino acids across represent the CRF01\_AE consensus in this region and are not included in subsequent logos. Red amino acids are not found in the vaccines, RV144 vaccine residues are in green and pentavalent vaccine residues displayed in blue. The frequency of each amino acid in each position is indicated by the height of the letter on the y-axis, and HXB2 positions are highlighted from left to right. (C) Amino acid alignment of vaccine Env V2 sequences. Red are essential glycan sites and green residues are sites of immune pressure in RV144. (D) Alignment of amino acids of the challenge SHIV and A244 V2 sequence with contact sites for CH58 and CH59 indicated by the red stars. Site of immune pressure in RV144 are in red and green. (E) Single-genome amplification of the challenge virus stock. Nucleotide changes from the master sequence (top) are indicated by colored boxes.

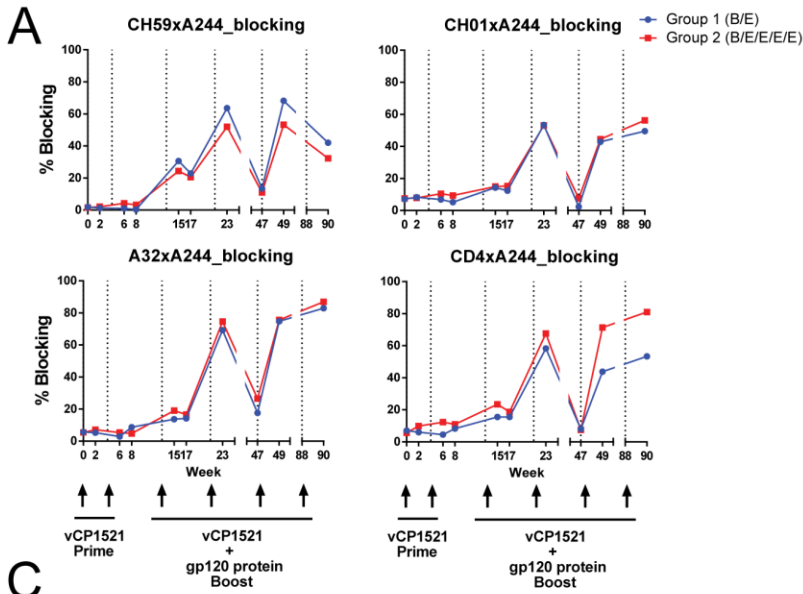

**B**

| Epitope ID    | Peptide Region |
|---------------|----------------|
| C1.68-84      | #23-25         |
| C1.83-100     | #28-29         |
| C1.95-121     | #32-36         |
| C1-V1.119-136 | #40-41         |
| V2.154-183    | #50-55         |
| V2.175-192    | #57-58         |
| C2.199-222    | #65-68         |
| C2.226-258    | #74-80         |
| C2-V3.289-303 | #95            |
| V3.298-321    | #98-101        |
| V3.312-335    | #102-105       |
| C3.354-375    | #116-118       |
| V4.405-423    | #130-131       |
| C4.424-453    | #136-141       |
| V5-C5.457-480 | #147-150       |
| C5.481-507    | #155-159       |
| C5.496-513    | #160-161       |

**C**

| Group | Animal ID | A Con | B Con | C Con | D Con | Group M | AE Con | AG Con | C ZM651 | C TV1 | C 1086 | B MN  | AE TH023 | AE A244 | All Clade* |
|-------|-----------|-------|-------|-------|-------|---------|--------|--------|---------|-------|--------|-------|----------|---------|------------|
| 1     | 201-08    | 8.0%  | 7.4%  | 10.4% | 6.1%  | 6.7%    | 10.4%  | 6.1%   | 7.4%    | 8.6%  | 9.2%   | 8.6%  | 11.7%    | 10.4%   | 6.9%       |
| 1     | 35-12     | 6.7%  | 8.0%  | 4.9%  | 3.7%  | 5.5%    | 6.1%   | 6.7%   | 3.7%    | 4.9%  | 6.1%   | 9.8%  | 8.0%     | 5.5%    | 5.4%       |
| 1     | 36-12     | 3.7%  | 6.1%  | 4.3%  | 2.5%  | 3.7%    | 7.4%   | 3.7%   | 2.5%    | 7.4%  | 4.9%   | 5.5%  | 8.0%     | 7.4%    | 4.6%       |
| 1     | 47-12     | 9.2%  | 9.8%  | 12.9% | 6.1%  | 8.0%    | 12.3%  | 11.0%  | 12.3%   | 12.3% | 11.0%  | 12.3% | 14.7%    | 15.3%   | 10.4%      |
| 1     | 92-09     | 3.7%  | 4.3%  | 6.1%  | 2.5%  | 4.3%    | 4.3%   | 4.9%   | 5.5%    | 6.1%  | 6.1%   | 5.5%  | 4.9%     | 6.1%    | 4.1%       |
| 1     | 43-12     | 6.7%  | 7.4%  | 8.0%  | 4.3%  | 5.5%    | 8.0%   | 6.7%   | 4.9%    | 7.4%  | 6.7%   | 8.0%  | 8.0%     | 8.0%    | 6.1%       |
| 1     | 53-12     | 6.7%  | 6.7%  | 9.2%  | 5.5%  | 5.5%    | 5.5%   | 4.9%   | 6.7%    | 6.7%  | 6.1%   | 6.7%  | 6.7%     | 8.6%    | 6.9%       |
| 1     | 71-12     | 4.3%  | 4.9%  | 3.1%  | 0.6%  | 3.1%    | 3.7%   | 4.3%   | 1.8%    | 3.7%  | 2.5%   | 5.5%  | 4.3%     | 5.5%    | 3.1%       |
| 1     | 86-12     | 1.2%  | 1.8%  | 4.3%  | 0.0%  | 1.8%    | 2.5%   | 1.2%   | 2.5%    | 5.5%  | 4.9%   | 2.5%  | 4.3%     | 3.7%    | 3.0%       |
| 2     | 357-08    | 6.7%  | 4.9%  | 4.9%  | 3.7%  | 4.9%    | 5.5%   | 6.1%   | 4.3%    | 5.5%  | 4.9%   | 5.5%  | 6.7%     | 6.7%    | 4.6%       |
| 2     | 41-12     | 6.1%  | 8.6%  | 7.4%  | 8.6%  | 6.1%    | 7.4%   | 6.1%   | 5.5%    | 9.2%  | 4.9%   | 9.8%  | 8.6%     | 5.5%    | 6.0%       |
| 2     | 49-12     | 3.1%  | 4.3%  | 4.3%  | 2.5%  | 3.1%    | 6.7%   | 3.7%   | 2.5%    | 7.4%  | 4.3%   | 5.5%  | 7.4%     | 6.1%    | 4.1%       |
| 2     | 54-12     | 8.0%  | 9.2%  | 11.0% | 8.6%  | 6.7%    | 13.5%  | 8.6%   | 6.7%    | 9.8%  | 6.7%   | 9.2%  | 15.3%    | 14.7%   | 7.3%       |
| 2     | 63-12     | 3.1%  | 3.1%  | 3.1%  | 1.2%  | 1.8%    | 3.7%   | 2.5%   | 0.6%    | 4.3%  | 3.7%   | 3.7%  | 4.3%     | 3.1%    | 2.6%       |
| 2     | 77-12     | 6.7%  | 7.4%  | 8.0%  | 6.1%  | 6.7%    | 12.9%  | 7.4%   | 6.1%    | 8.0%  | 8.6%   | 7.4%  | 12.3%    | 10.4%   | 6.9%       |
| 2     | 52-12     | 9.8%  | 11.0% | 16.6% | 10.4% | 12.3%   | 16.6%  | 11.0%  | 12.9%   | 14.1% | 12.3%  | 11.7% | 18.4%    | 17.2%   | 11.9%      |
| 2     | 74-12     | 7.4%  | 6.7%  | 8.6%  | 4.9%  | 6.1%    | 9.8%   | 7.4%   | 6.7%    | 9.8%  | 6.7%   | 8.0%  | 9.2%     | 9.8%    | 7.1%       |
| 2     | 48-12     | 12.3% | 11.7% | 14.1% | 9.2%  | 12.9%   | 15.3%  | 11.7%  | 11.0%   | 13.5% | 14.7%  | 12.9% | 16.6%    | 16.6%   | 10.5%      |

**D**

| Group | Animal ID | C1.1   | C1.2   | C1.3   | C1-V1  | V2     | C2.1   | C2.2   | V3      | C3       | V4       | C4       | V5-C5    | C5       |
|-------|-----------|--------|--------|--------|--------|--------|--------|--------|---------|----------|----------|----------|----------|----------|
|       |           | #23-25 | #28-29 | #32-36 | #40-41 | #50-57 | #65-68 | #74-80 | #95-106 | #116-118 | #130-131 | #136-141 | #147-150 | #155-161 |
| 1     | 201-08    | 10,270 | 1      | 69     | 2,171  | 2,437  | 7,529  | 1      | 49,011  | 218      | 732      | 875      | 1,922    | 4,998    |
| 1     | 35-12     | 3,607  | 1      | 496    | 2,350  | 949    | 341    | 1      | 28,358  | 315      | 1        | 36       | 1,333    | 8,222    |
| 1     | 36-12     | 1,742  | 1      | 1      | 815    | 580    | 7,851  | 620    | 18,017  | 1        | 242      | 237      | 1,519    | 404      |
| 1     | 47-12     | 1,335  | 1      | 1,202  | 1      | 1,494  | 6,654  | 1      | 29,280  | 159      | 1        | 11,516   | 2,511    | 4,684    |
| 1     | 92-09     | 1      | 1      | 3,620  | 697    | 487    | 18,362 | 1      | 49,378  | 17       | 1        | 123      | 1        | 125      |
| 1     | 43-12     | 4      | 1      | 294    | 1      | 1      | 8,153  | 1      | 15,804  | 1        | 1        | 3,976    | 8,774    | 41,979   |
| 1     | 53-12     | 26,387 | 1      | 1      | 1,740  | 791    | 311    | 7,024  | 39,676  | 66       | 966      | 25,282   | 6,149    | 3,943    |
| 1     | 71-12     | 915    | 1      | 559    | 726    | 1      | 870    | 1      | 11,173  | 1        | 1        | 26       | 1,926    | 1,324    |
| 1     | 86-12     | 1      | 1      | 407    | 60     | 7,723  | 3,607  | 1      | 24,531  | 5,733    | 1        | 1        | 1        | 1        |
| 2     | 357-08    | 1      | 1      | 202    | 130    | 668    | 1,730  | 1      | 15,414  | 27       | 1        | 36       | 6,816    | 3,420    |
| 2     | 41-12     | 309    | 1      | 983    | 709    | 77     | 1      | 189    | 9,205   | 1        | 16       | 1        | 422      | 11,057   |
| 2     | 49-12     | 50     | 1      | 977    | 27     | 1      | 262    | 1      | 9,296   | 1        | 1        | 2,245    | 3,277    | 4,551    |
| 2     | 54-12     | 350    | 1      | 1,668  | 175    | 957    | 3,869  | 497    | 10,557  | 1        | 1        | 312      | 3,035    | 18,115   |
| 2     | 63-12     | 8      | 1      | 517    | 1      | 518    | 1      | 354    | 10,568  | 42       | 37       | 1        | 2,814    | 797      |
| 2     | 77-12     | 3,947  | 1      | 1,635  | 3,452  | 1      | 779    | 5,656  | 15,841  | 1        | 1        | 292      | 2,864    | 5,765    |
| 2     | 52-12     | 25,468 | 1      | 1,475  | 483    | 1,008  | 9,664  | 381    | 28,476  | 5,776    | 7        | 1,016    | 121      | 6,460    |
| 2     | 74-12     | 439    | 302    | 828    | 306    | 1      | 1,695  | 1,622  | 18,508  | 13       | 761      | 525      | 1,306    | 3,555    |
| 2     | 48-12     | 8,479  | 1      | 2,573  | 3,337  | 1,851  | 1,491  | 9,749  | 25,546  | 5,865    | 1        | 254      | 5,162    | 11,418   |

**Supplementary Figure 2. Humoral immune response to vaccination.** (A) Plasma antibody blocking of CH59, CH01, A32 antibodies and sCD4 to A244 over the course of immunization by competitive ELISA. Average of all animals graphed. (B) HIV-1 Env region/epitope and corresponding peptide number on array. (C) Chart showing the percentage of positive peptides in a peptide microarray that contains overlapping 15-mer peptides covering the Env gp160 for 7 clade consensus (A, B, C, D, M, AE, AG) and 6 vaccine strains (ZM651, TV1, 1086, MN, 92TH023, and A244). Positive threshold is signal intensity/IgG concentration > 100. (D) Chart showing the maximum binding intensity for all clades along the HIV-1 Env regions (MFI/IgG concentration).

### IgG (Week 0)

- Group 1 (B/E)
- Group 2 (B/E/E/E/E)
- Negative responder

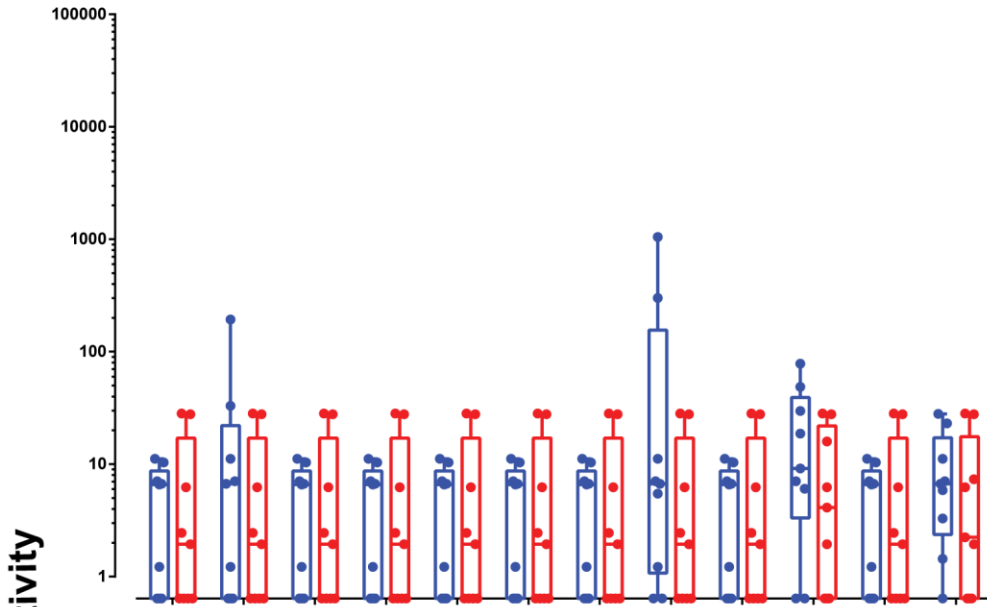

### IgG (Week 23)

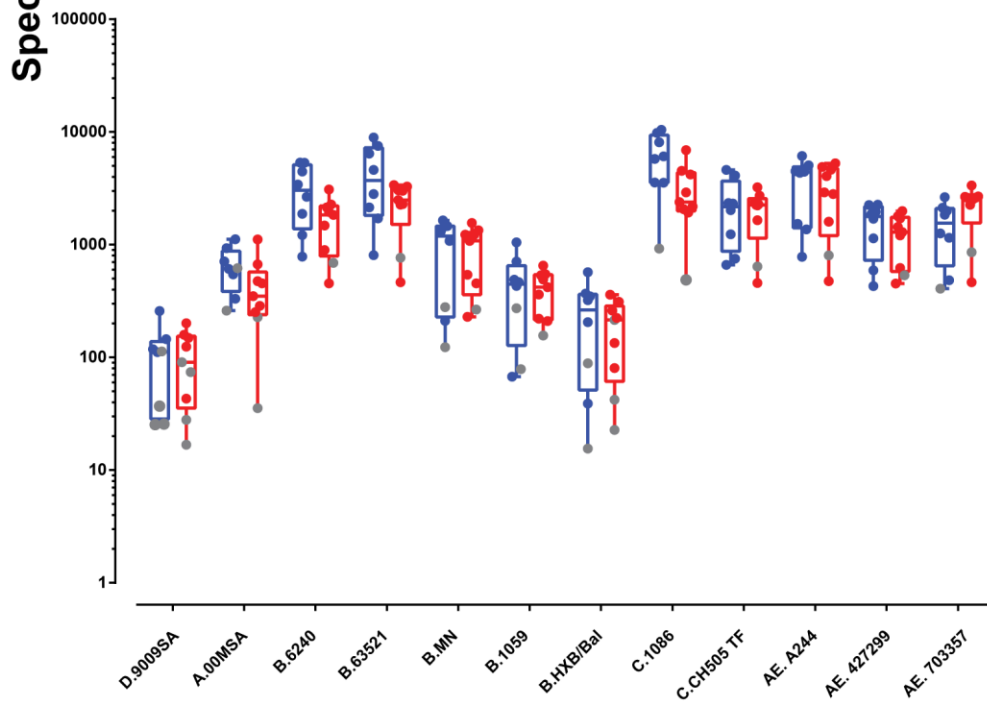

**Supplementary Figure 3. Mucosal antibody binding responses.** Mucosal IgG purified from rectal wecks taken at week 0 and week 23 (after 2<sup>nd</sup> protein boost) were tested for binding of 12 multi-clade HIV-1 Env proteins using the binding antibody multiplex assay. Binding intensity measure as mean fluorescence intensity (MFI) and normalized by IgG concentration (specific activity). Positive response determined when specific activity 3x baseline and 95<sup>th</sup> percentile of all baseline samples for each antigen. Each dot within the box and whisker plot represents an individual animal in the bivalent (blue) and pentavalent (red) immunized groups.

A

| Tier     | Virus Name         | Week | Group 1 (B/E) |       |       |       |       |       |       |        | Group 2 (B/E/E/E) |       |       |       |       |       |       |       |       |       |
|----------|--------------------|------|---------------|-------|-------|-------|-------|-------|-------|--------|-------------------|-------|-------|-------|-------|-------|-------|-------|-------|-------|
|          |                    |      | 35-12         | 47-12 | 53-12 | 71-12 | 74-12 | 86-12 | 92-09 | 201-08 | 357-08            | 36-12 | 41-12 | 43-12 | 48-12 | 49-12 | 52-12 | 54-12 | 63-12 | 77-12 |
| 2        | SHIV1157(QNE)Y173H | 90   | <20.0         | <20.0 | <20.0 | <20.0 | <20.0 | <20.0 | <20.0 | <20.0  | <20.0             | <20.0 | <20.0 | <20.0 | <20.0 | <20.0 | <20.0 | <20.0 | <20.0 | <20.0 |
| 2        | AA058a04R          | 0    | <20.0         | <20.0 | <20.0 | <20.0 | <20.0 | <20.0 | <20.0 | <20.0  | <20.0             | <20.0 | <20.0 | <20.0 | <20.0 | <20.0 | <20.0 | <20.0 | <20.0 | <20.0 |
| 2        | AA104aRH5          | 0    | <20.0         | <20.0 | <20.0 | <20.0 | <20.0 | <20.0 | <20.0 | <20.0  | <20.0             | <20.0 | <20.0 | <20.0 | <20.0 | <20.0 | <20.0 | <20.0 | <20.0 | <20.0 |
| 2        | AA107awg8          | 0    | 21            | <20.0 | <20.0 | <20.0 | <20.0 | <20.0 | <20.0 | <20.0  | <20.0             | <20.0 | <20.0 | <20.0 | <20.0 | <20.0 | <20.0 | <20.0 | <20.0 | <20.0 |
| 2        | CNE8               | 90   | <20.0         | <20.0 | <20.0 | <20.0 | <20.0 | <20.0 | <20.0 | <20.0  | <20.0             | <20.0 | <20.0 | <20.0 | <20.0 | <20.0 | <20.0 | <20.0 | <20.0 | <20.0 |
| 2        | CM244              | 90   | <20.0         | <20.0 | <20.0 | <20.0 | <20.0 | <20.0 | <20.0 | <20.0  | <20.0             | <20.0 | <20.0 | <20.0 | <20.0 | <20.0 | <20.0 | <20.0 | <20.0 | <20.0 |
| 1        | Bal.26             | 23   | 27            | 41    | 38    | 29    | 50    | <20.0 | 22    | 35     | 35                | 34    | <20.0 | 21    | <20.0 | 62    | 24    | <20.0 | 32    | 23    |
| 1        | 6644.v2.c33        | 90   | 161           | 273   | 174   | 72    | 150   | 70    | 154   | 288    | 78                | 316   | 126   | 116   | 162   | 66    | 82    | 115   | 91    | 92    |
| 1        | MN.3               | 23   | 430           | 805   | 1223  | 506   | 2071  | 1047  | 356   | 630    | 944               | 1168  | 172   | 159   | 216   | 898   | 469   | 280   | 534   | 367   |
| 1        | MW965.26           | 23   | 436           | 2737  | 1782  | 467   | 1176  | 617   | 1007  | 752    | 660               | 2054  | 96    | 183   | 376   | 451   | 508   | 409   | 955   | 349   |
| 1        | NP03.13            | 23   | 70            | 140   | 91    | <20.0 | 152   | <20.0 | 34    | 108    | 28                | 117   | 24    | 69    | 343   | 39    | 92    | 36    | 132   | 112   |
| 1        | SF162.LS           | 23   | 32            | 42    | 34    | 38    | 74    | <20.0 | 29    | 61     | 32                | 41    | <20.0 | 37    | 39    | 53    | 27    | <20.0 | 42    | 48    |
| 1        | SS1196.1           | 90   | 64            | 32    | 46    | 31    | 57    | 62    | 61    | 46     | <20.0             | 57    | 75    | 38    | 75    | 34    | 39    | 63    | 40    | 40    |
| 1        | TH023.6            | 23   | 2665          | 2153  | 1963  | 922   | 2431  | 177   | 2609  | 3024   | 2105              | 8601  | 273   | 18492 | 3575  | 3223  | 5661  | 1217  | 2954  | 1425  |
| Negative | SVA-MLV            | 49   | <20.0         | <20.0 | <20.0 | 28    | <20.0 | <20.0 | 43    | <20.0  | <20.0             | <20.0 | <20.0 | <20.0 | <20.0 | 27    | 23    | <20.0 | 22    | <20.0 |
|          |                    | 90   | <20.0         | <20.0 | <20.0 | <20.0 | <20.0 | <20.0 | <20.0 | <20.0  | <20.0             | <20.0 | <20.0 | <20.0 | <20.0 | <20.0 | <20.0 | <20.0 | <20.0 | <20.0 |

B

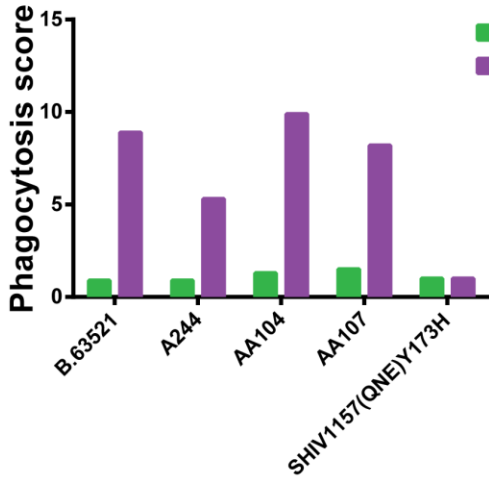

C

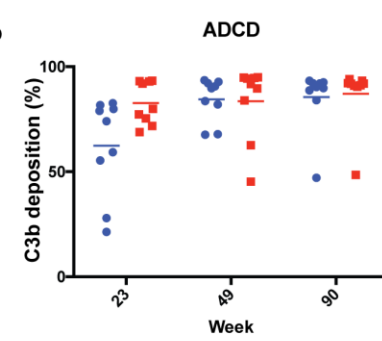

D

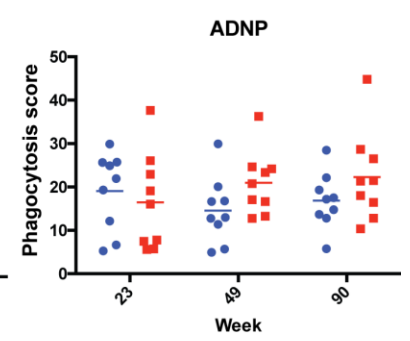

E

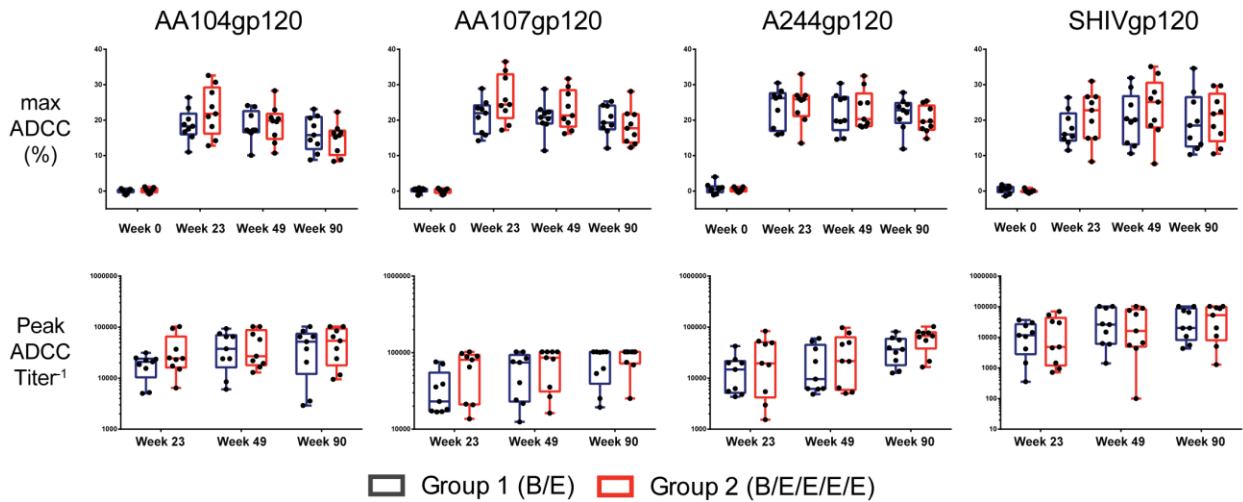

**Supplementary Figure 4. Plasma antibody effector functions.** (A) Plasma neutralization of Tier-1 viruses at weeks 23, 49 and prior to challenge at week 90 and the tier-2 viruses at week 90 measured in the TZM-bl neutralization assay (red > 500, orange > 50, yellow < 50). (B) Phagocytosis of vaccine and challenge gp120 coated targets by positive (HIVIG) and negative (palivizumab) controls. Average of two replicate experiments. (C-D) High-throughput Fc functional analysis. Purified plasma IgG from each animal from group 1 and 2 were tested for (C) Complement deposition (C3b) on the surface of A244 gp120 pulsed CD4+ target cells from HIV-negative donors. (D) Antibody-dependent Neutrophil-mediated phagocytosis against A244 gp120 coated beads by primary neutrophils. Horizontal line indicates group mean. (E) Max ADCC (top), peak ADCC titer (Endpoint dilution that scored above positive threshold; bottom) of gp120 coated target cells (CEM.NKR<sub>CCR5</sub>) by plasma from both immunization groups measured using the ADCC-GTL assay.



**A**

| #  | Binding          | Blocking               | Neutralization | ADCP               | ADCC                                           |
|----|------------------|------------------------|----------------|--------------------|------------------------------------------------|
| 1  | A244 gp120       | A32 x A244 gp120       | Bal.26         | A244               | Binding infected cells MFI (CM235 infected)    |
| 2  | AA058 gp120      | 2g12 x JRFL            | MW965.26       | 63521              | Binding infected cells %cells (CM235 infected) |
| 3  | AA104 gp120      | CH01 x A244 gp120      | NP03.13        | AA104              | ADCC % killing (CM235 infected)                |
| 4  | AA107 gp120      | CH103 x 63521 gp120    | SF162.LS       | AA107              | ADCC titer (CM235 infected)                    |
| 5  | 63521 gp120      | CH103 x CH505 TF gp120 | SS1196.1       | SHM-1157(QNE)Y173H | ADCC titer (A244 gp120)                        |
| 6  | 6644 gp120       | CH58 x A244 gp120      | TH023.6        |                    | ADCC titer (AA104gp120 coated)                 |
| 7  | 63521 V2 peptide | CH59 x A244 gp120      | GeoMean        |                    | ADCC titer (AA107gp120 coated)                 |
| 8  | A244 V2 peptide  | CD4 x 63521 gp120      |                |                    | ADCC titer (SHM1157(QNE)Y173Hgp120 coated)     |
| 9  | AA058 V2 peptide | CD4 x A244 gp120       |                |                    | ADCC %GzB (CM235 infected)                     |
| 10 | AA104 V2 peptide | CD4 x CH505 T F gp120  |                |                    | ADCC %GzB (A244 gp120)                         |
| 11 | AA107 V2 peptide | CD4 x JRFL             |                |                    | ADCC %GzB (AA104gp120 coated)                  |
| 12 |                  | PG9 x A244 gp120       |                |                    | ADCC %GzB (AA107gp120 coated)                  |
| 13 |                  | PG9 x B 6240 gp120     |                |                    | ADCC %GzB (SHV1157(QNE)Y173H gp120 coated)     |

**B**

| HT-Functional Assays (A244 gp120) |
|-----------------------------------|
| ADCD                              |
| ADNP                              |
| ADCC                              |
| ADCP                              |
| MIP-1 $\beta$                     |
| CD107a                            |
| IFN- $\gamma$                     |

**C**

| #  | Binding                  | Detection Reagents |
|----|--------------------------|--------------------|
| 1  | A244 gp120               | Rh.IgA             |
| 2  | AA058 gp120              | Rh.IgG             |
| 3  | AA104 gp120              | Hu.C1q             |
| 4  | AA107 gp120              | Hu.FcgRIIAH        |
| 5  | 63521 gp120              | Hu.FcgRIIAR        |
| 6  | 6644 gp120               | Hu.FcgRIIB         |
| 7  | 63521 V2 peptide         | Hu.FcgRIIAF        |
| 8  | A244 V2 peptide          | Hu.FcgRIIAV        |
| 9  | AA058 V2 peptide         | Hu.FcgRIIIB NA1    |
| 10 | AA104 V2 peptide         | Rh.FcgR2A-3        |
| 11 | AA107 V2 peptide         | Rh.FcgR2A-4        |
| 12 | A244 V1V2 tags           | Rh.FcgR3A-1        |
| 13 | B.CaseA V1V2 tags        | Rh.FcgR3A-3        |
| 14 | SHV-1157(QNE)Y173H gp120 |                    |
| 15 | BAL gp120                |                    |
| 16 | CM2235 gp120             |                    |
| 17 | Du151 gp120              |                    |
| 18 | Du156.12 gp120           |                    |
| 19 | JRC5F gp120              |                    |
| 20 | MN gp120                 |                    |
| 21 | PVO gp120                |                    |
| 22 | YU2 gp120                |                    |
| 23 | ZM109F gp120             |                    |
| 24 | Du151 gp140              |                    |
| 25 | HxBc2 gp41               |                    |
| 26 | HxBc2 p24                |                    |
| 27 | SHV-SF162p3 V1V2         |                    |
| 28 | A1.con_env03 gp140       |                    |
| 29 | AE01.con_env03 gp140     |                    |
| 30 | B.con_env03 gp140        |                    |
| 31 | C.con_env03 gp140        |                    |
| 32 | CON-S gp140              |                    |
| 33 | ConB gp70 V1V2           |                    |
| 34 | ConC gp70 V1V2           |                    |
| 35 | SF162 gp120              |                    |
| 36 | SF162.LS gp140           |                    |

**D**

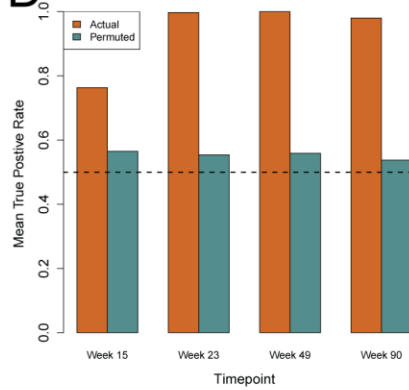

**E**

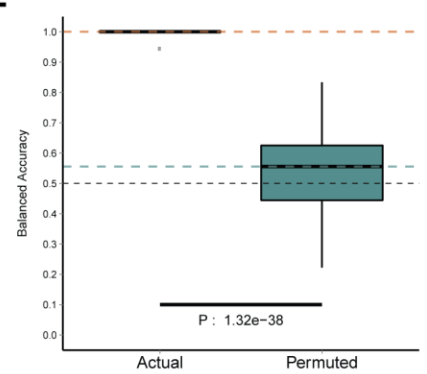

**F**

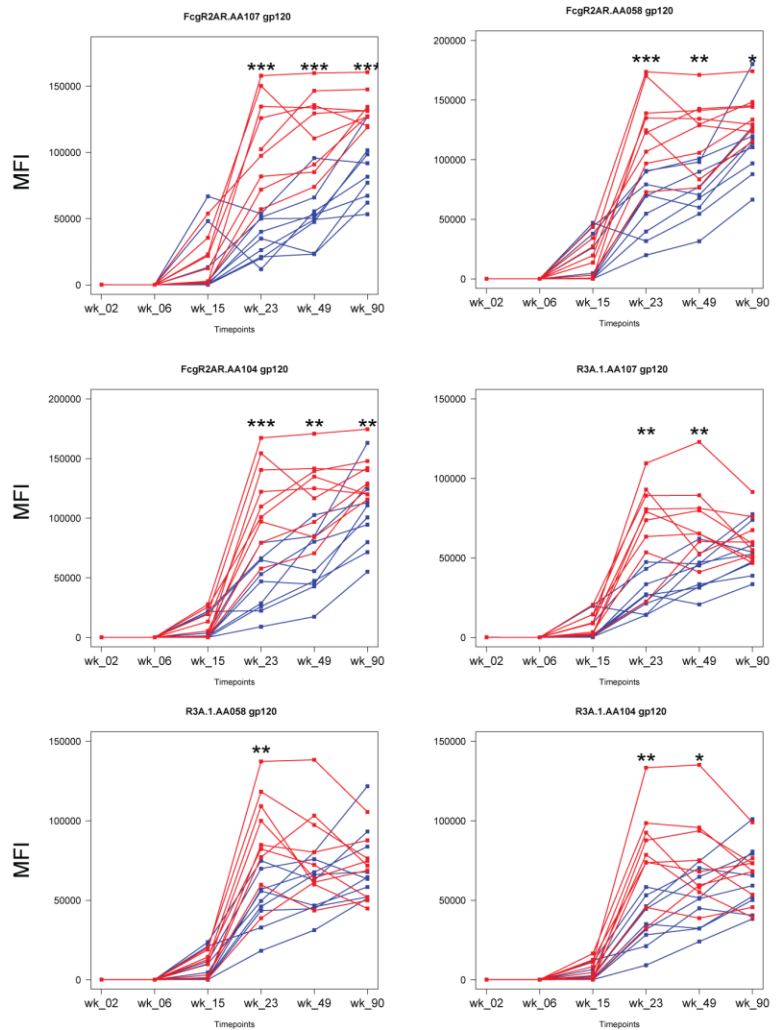

**Supplementary Figure 5. Bivalent and pentavalent vaccine arms elicit different antibody responses. (A)**

Parameters that were measured pre-challenge (week 90) that were used for correlate analysis. **(B)** Parameters measured by high-throughput antibody profiling with A244 gp120 coated target cells. **(C)** Antigens and detection reagents used in the Fc array assay. **(D)** Mean True Positive Rate (balanced accuracy) of 100 runs of 9-fold cross-validation from weeks 15 through 90, comparing accuracy in predicting true group labels (cyan) vs. permuted labels (orange). The classifiers were trained on measurements taken only at the respective timepoints. **(E)** Test of robustness for models trained on measurements taken at the second protein boost (week 23), comparing performance of 100 repetitions of 9-fold cross-validation for actual (orange) vs. permuted (cyan) group labels. Significance was evaluated using the Wilcoxon-Mann-Whitney test. **(F)** Other antibody responses illustrating the evolving differences between groups; Wilcoxon-Mann-Whitney, \* :  $P < 0.05$ , \*\* :  $P < 0.01$ , \*\*\* :  $P < 0.001$ .

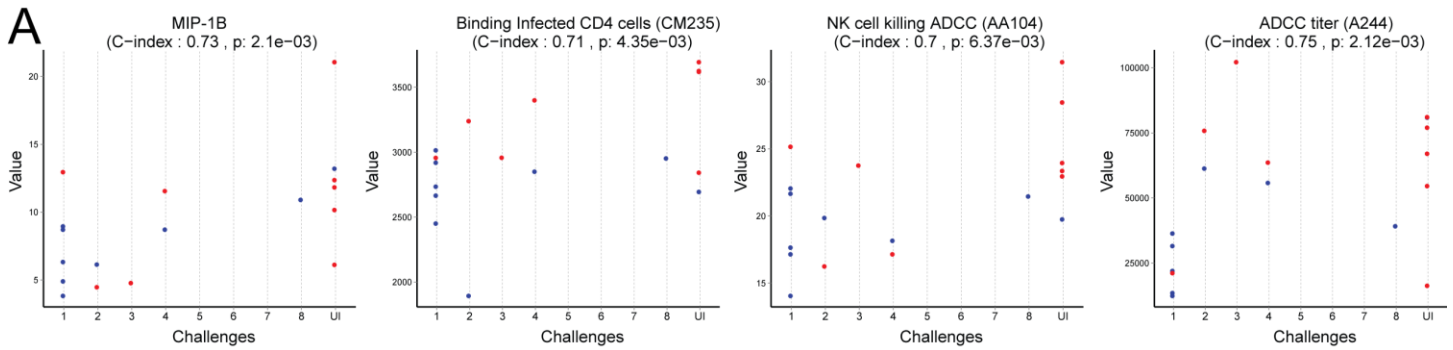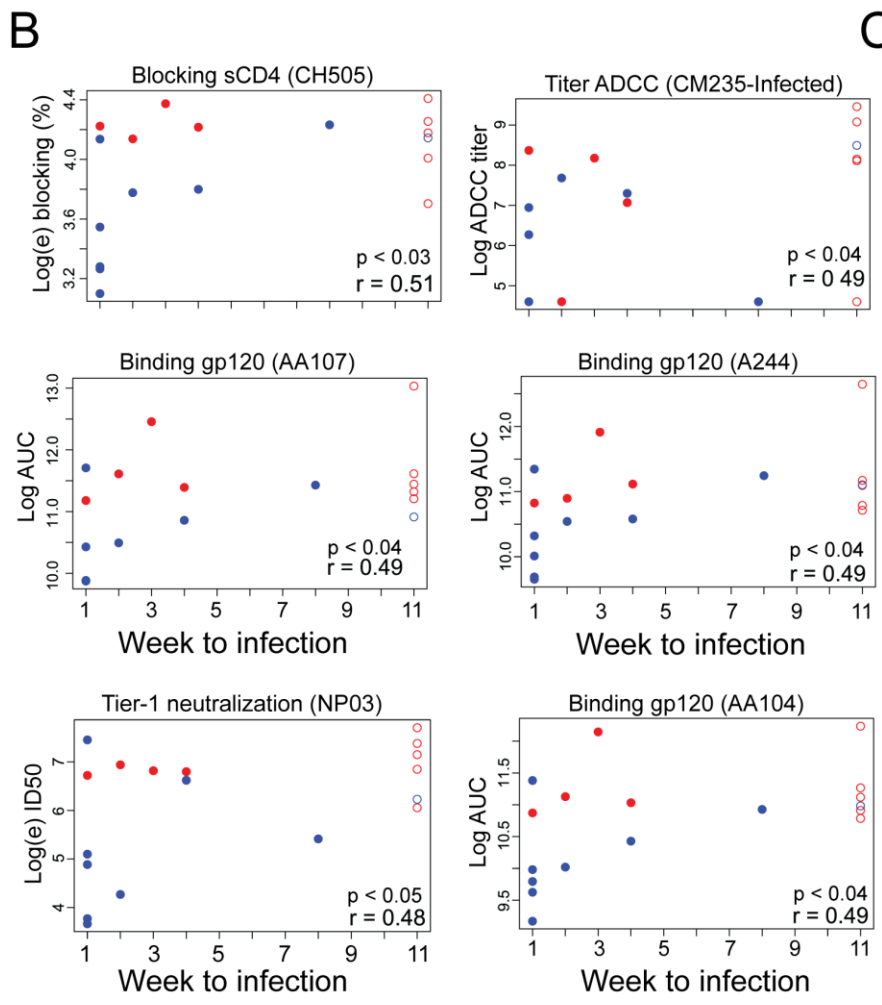

**C** Parameter estimates from Cox Proportional Hazard model with time varying covariates.

| Parameter                    | Hazard ratio | P-value |
|------------------------------|--------------|---------|
| Binding B.63521 gp120        | 1.060        | 0.9051  |
| Binding AA107 gp120          | 0.448        | 0.0769  |
| Binding AA107 V2 peptide     | 0.961        | 0.8222  |
| Blocking A32 on A244 gp120   | 0.094        | 0.3211  |
| Blocking sCD4 on CH505 gp120 | 0.176        | 0.1568  |
| Blocking sCD4 on JRFL gp120  | 0.882        | 0.5735  |

**Supplementary Figure 6. Correlates of delayed infection.** (A) C-indices of individual variables used in Fig. 5E. (B) Correlation of antibody ADCC, binding and blocking titers and tier-1 neutralization at week 90 with the number of weeks after challenge required to establish infection. The plotted data reflect only the vaccinated animals and not controls. Group 1 (B/E) in blue and group 2 (B/E/E/E/E) in red, open circles indicate animals uninfected after 8 challenges. *P* values reflect Spearman rank correlation tests. (C) Parameters that were measured pre-challenge (week 90) and weekly until infection. *P* values reflect analysis with a Cox Proportional Hazard model with time varying covariates.

**A**

| Group        | Animal | Week | Hook                       | # Antibodies |
|--------------|--------|------|----------------------------|--------------|
| B/E/E/E/E    | 4312   | 23   | B.63521 V1/V2              | 3            |
| B/E/E/E/E    | 4312   | 23   | A244 gp120 V.<br>N156N160K | 1            |
| B/E/E/E/E    | 4812   | 23   | A244 V1/V2                 | 8            |
| B/E/E/E/E    | 4812   | 23   | A244 gp120                 | 29           |
| B/E/E/E/E    | 4812   | 49   | A244 gp120                 | 96           |
| <b>Total</b> |        |      |                            | <b>137</b>   |

**B**

| Antibody ID | VH gene | HCDR3 Length (AA) | VH Mutation (nt %) | VL gene       | LHCDR3 Length (AA) | VL mutation (nt %) | Specificity |
|-------------|---------|-------------------|--------------------|---------------|--------------------|--------------------|-------------|
| DH631       | 1-E     | 16                | 4.5                | $\lambda$ 2-D | 10                 | 1.7                | CD4bs       |
| DH632       | 1-E     | 16                | 6.6                | $\lambda$ 2-D | 10                 | 2                  | CD4bs       |
| DH633       | 1-E     | 16                | 4.5                | $\lambda$ 2-D | 10                 | 4                  | CD4bs       |
| DH635       | 4-J     | 20                | 7.1                | $\kappa$ 7-1  | 8                  | 4.3                | CD4bs       |
| DH640       | 4-D     | 11                | 7.8                | $\kappa$ 2-1  | 9                  | 3.6                | gp120       |
| DH637       | 4-K     | 17                | 5.7                | $\kappa$ 2-S4 | 9                  | 3.5                | V1/V2       |
| DH638       | 4-F     | 16                | 8.9                | $\lambda$ 5-B | 9                  | 1.9                | V1/V2       |
| DH641       | 3-AA    | 17                | 4.4                | $\lambda$ 2-F | 10                 | 6                  | V1/V2       |

**C**

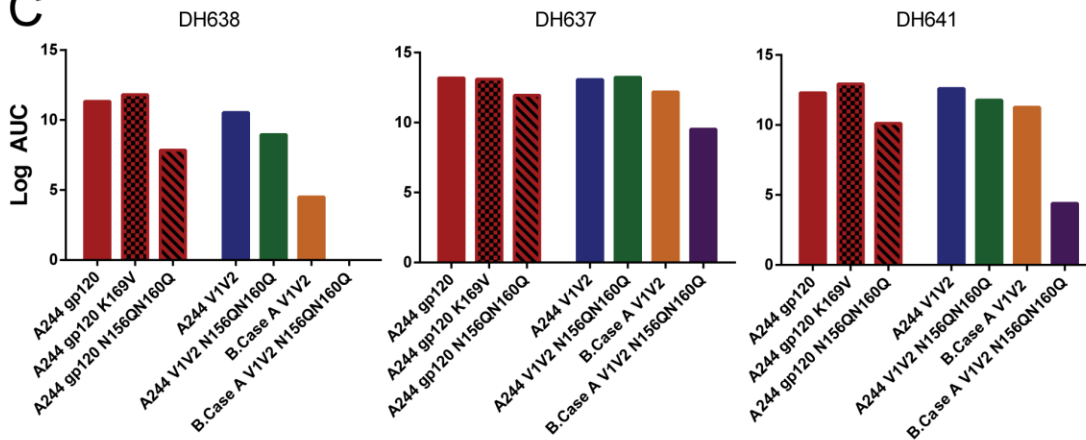

**D**

| Peptide | Clade/Strain | Sequence        | Signal Intensity |
|---------|--------------|-----------------|------------------|
| 56      | A244&TH023   | VHALFYKLDVPIED  | 6,273            |
| 56      | MN           | EYALLYKLDIEPIDN | 3,327            |
| 56      | 1086         | VHALFYKLDVPLNG  | 4,529            |
| 56      | TV1          | EYALFYRLDIVSLNN | 6                |
| 56      | ZM651        | VYALFYKLDIVSLNE | 5                |
| 56      | M            | VYALFYRLDVVPINN | 9                |
| 56      | A            | VYSLFYRLDVVQINE | 160              |
| 56      | B            | EYALFYKLDVVPIDN | 2,575            |
| 56      | C            | VYALFYRLDIVPLNE | 6                |
| 56      | D            | VYALFYKLDVVPIDN | 23               |
| 56      | CRF1         | VYALFYKLDVQIEN  | 398              |
| 56      | CRF2         | VYALFYRLDVVQINE | 1                |
| 57      | A244         | LFYKLDVPIEDNND  | 7,979            |
| 57      | A244         | YKLDVPIEDNNDSS  | 24,232           |
| 57      | TH023        | LFYKLDVPIEDNTS  | 3,169            |
| 57      | TH023        | YKLDVPIEDNTSSS  | 23,156           |
| 57      | MN           | LLYKLDIEPIDNDST | 2,300            |
| 57      | 1086         | LFYKLDVPLNGNSS  | 12,100           |
| 57      | 1086         | KLDVPLNGNSSSSG  | 1,284            |
| 57      | 1086         | DVPLNGNSSSSGGEY | 1,321            |
| 57      | TV1          | LFYRLDIVSLNKKPN | 3,511            |
| 57      | ZM651        | LFYKLDVSLNETDD  | 49               |
| 57      | M            | LFYRLDVVPINNNS  | 665              |
| 57      | A            | LFYRLDVQINENSN  | 11,677           |
| 57      | B            | LFYKLDVVPIDNDNT | 8,932            |
| 57      | C            | LFYRLDIVPLNENNS | 5,076            |
| 57      | D            | LFYKLDVVPIDNNS  | 5,483            |
| 57      | CRF1         | LFYKLDVQIENNS   | 11,604           |
| 57      | CRF2         | LFYRLDVQINENNS  | 1,086            |

**E**

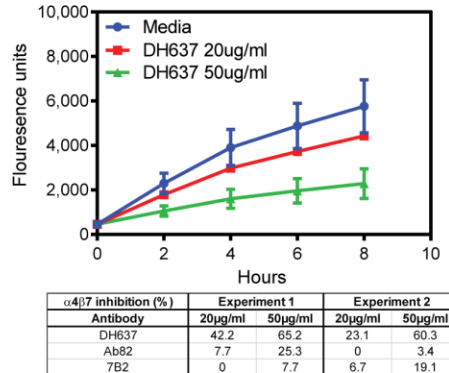

**F**

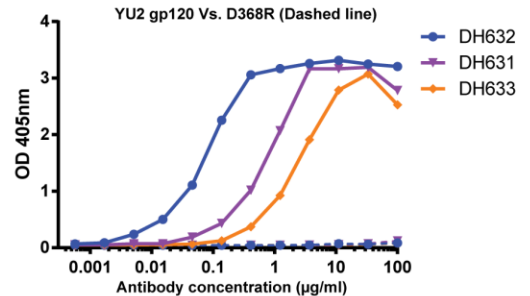

**Supplementary Figure 7. Isolation of antibodies from macaques immunized with the pentavalent vaccine.**

**(A)** Number of antibodies isolated from each animal, timepoint and antigen used for sorting. **(B)**

Immunogenetic characteristics of isolated antibodies. **(C)** ELISA binding of DH638, DH637 and DH641 to

wild-type and mutated gp120 and V1/V2 HIV antigens. **(D)** DH637 binding (signal intensity) to peptides on a

linear microarray. Sequences of peptides 56 and 57 that are in the V2 and contain the  $\alpha_4\beta_7$  integrin binding site

for each clade/strain are shown. **(E)** Inhibition of  $\alpha_4\beta_7$  on RPMI8866 cells to cyclic 92TH023 (Clade E Env)

V2 epitope peptide by DH637. Representative graph of blocking over time of  $\alpha_4\beta_7$  by DH637 at 20 $\mu$ g/ml and

50 $\mu$ g/ml antibody concentrations or media (blue) over time. Chart below shows the percent inhibition of both

experiments by DH637 and two negative control antibodies (Ab82, influenza; 7B2, HIV gp41). Both

Experiments performed in triplicate. Error bars indicate standard deviation. **(F)** ELISA binding of DH632,

DH631 and DH633 to YU2 gp120 (Solid line) and YU2 gp120 D368R mutant (Dashed line).
